# Supplementary material for: Contributions of Nordic anthropogenic emissions on air pollution and premature mortality over the Nordic region and the Arctic
Source: Copernicus journal article supplement (doi:10.5194/acp-19-12975-2019), 2019-10-21
Supplement: Supplementary file 1 [file acp-19-12975-2019-supplement.pdf]

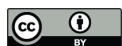

*Supplement of*

**Contributions of Nordic anthropogenic emissions on air pollution and premature mortality over the Nordic region and the Arctic**

Ulas Im et al.

*Correspondence to:* Ulas Im (ulas@envs.au.dk)

The copyright of individual parts of the supplement might differ from the CC BY 4.0 License.

The Danish Air Quality Monitoring Programme consists of an urban monitoring network that includes stations in the four largest Danish cities (Aalborg, Aarhus, Copenhagen and Odense) and two background stations in rural areas (Keldsnor and Risø). The design of the Danish air quality monitoring network is based on location of one or more pairs of stations in each of the four cities (Ellermann et al., 2015). In each city one of the stations is located at a pollution hot spot close (at the sidewalk) to a street lane with a high traffic density. The other station is located within a few hundred meters from the street station. It is placed so that it is not influenced by emissions from a single or a few streets or other nearby sources and hence is representative for the urban background pollution. In most cases the background stations are placed on rooftops. In addition, rural stations monitor the pollution outside city areas.

The measurement data for Finland represents regional and urban background levels. Data from the global and regional background stations are reported to European Monitoring and Evaluation Programme (EMEP) under the CLRTAP (Convention on Long-range Transboundary Air Pollution, <http://www.unece.org/env/lrtap>), and are available at <http://ebas.nilu.no>. The data for the urban background stations are reported at the 'Air Quality in Finland' web pages by the Finnish Meteorological Institute (<https://en.ilmatieteenlaitos.fi/air-quality>).

The measurement dataset from Norway is from the national monitoring program of air pollutants financed by the Norwegian Environment Agency (Aas et al, 2018), and also reported to European Monitoring and Evaluation Programme (EMEP) under the CLRTAP (Convention on Long-range Transboundary Air Pollution, <http://www.unece.org/env/lrtap>). The data is openly available at <http://ebas.nilu.no>. The data from the city background stations is reported to European Environmental Agency (EEA: <http://www.eea.europa.eu/>) as required in the EU air quality directive (EU, 2008) and it is available at <http://www.luftkvalitet.info>.

The measurement dataset for Sweden were extracted from the openly available Shair data base (<http://shair.smhi.se/portal/concentrations-in-air>), which includes most national environmental data and is financed by the Swedish Environmental Agency. The observation sites used here were carefully selected to represent urban background at rooftop level, rural or regional background, and to have known good quality.

Table S1. Geographical information of the measurement stations used for model evaluation.

| Station Name            | Longitude | Latitude | Station Type        | Pollutants                                                              |
|-------------------------|-----------|----------|---------------------|-------------------------------------------------------------------------|
| Denmark                 |           |          |                     |                                                                         |
| Anholt                  | 11.52     | 56.72    | Regional background | NO <sub>2</sub>                                                         |
| Ulborg                  | 8.43      | 56.29    | Regional background | NO <sub>2</sub> , O <sub>3</sub>                                        |
| Keldsnor                | 10.74     | 54.75    | Regional background | NO <sub>2</sub> , O <sub>3</sub> , PM <sub>10</sub>                     |
| Risø                    | 12.09     | 55.69    | Regional background | NO <sub>2</sub> , O <sub>3</sub> , PM <sub>10</sub> , PM <sub>2.5</sub> |
| Odense Rådhus           | 10.39     | 55.40    | Urban background    | NO <sub>2</sub> , O <sub>3</sub>                                        |
| Aarhus Botanical Garden | 10.19     | 56.16    | Urban background    | NO <sub>2</sub> , O <sub>3</sub> , PM <sub>2.5</sub>                    |
| Aalborg Østerbro        | 9.93      | 57.05    | Urban background    | NO <sub>2</sub> , O <sub>3</sub> , PM <sub>2.5</sub>                    |
| Copenhagen HCØ          | 12.56     | 55.70    | Urban background    | NO <sub>2</sub> , O <sub>3</sub> , PM <sub>10</sub> , PM <sub>2.5</sub> |
| Finland                 |           |          |                     |                                                                         |
| Luukki                  | 24.68     | 60.31    | Regional background | NO <sub>2</sub> , O <sub>3</sub> , PM <sub>2.5</sub> , SO <sub>2</sub>  |

|                                |       |       |                     |                                                                                           |
|--------------------------------|-------|-------|---------------------|-------------------------------------------------------------------------------------------|
| Oulanka                        | 29.40 | 66.32 | Regional background | NO <sub>2</sub> , O <sub>3</sub> , SO <sub>2</sub>                                        |
| Sammaltunturi                  | 24.11 | 67.97 | Regional background | NO <sub>2</sub> , O <sub>3</sub> , SO <sub>2</sub>                                        |
| Uto                            | 21.37 | 59.78 | Regional background | NO <sub>2</sub> , O <sub>3</sub> , PM <sub>2.5</sub> , SO <sub>2</sub>                    |
| Virolahti                      | 27.67 | 60.53 | Regional background | NO <sub>2</sub> , O <sub>3</sub> , PM <sub>10</sub> , PM <sub>2.5</sub> , SO <sub>2</sub> |
| Ahtari_2                       | 24.19 | 62.59 | Regional background | NO <sub>2</sub> , O <sub>3</sub>                                                          |
| Kallio_2                       | 24.95 | 60.19 | Urban background    | NO <sub>2</sub> , O <sub>3</sub> , PM <sub>10</sub> , PM <sub>2.5</sub> , SO <sub>2</sub> |
| Kasarmipuisto                  | 27.67 | 62.89 | Urban background    | NO <sub>2</sub> , O <sub>3</sub> , PM <sub>10</sub> , PM <sub>2.5</sub>                   |
| Kisapuisto                     | 25.65 | 60.99 | Urban background    | NO <sub>2</sub>                                                                           |
| Norway                         |       |       |                     |                                                                                           |
| Birkenesobservatoriet          | 8.25  | 58.39 | Regional background | O <sub>3</sub>                                                                            |
| Haukenes                       | 9.49  | 59.20 | Regional background | NO <sub>2</sub> , O <sub>3</sub>                                                          |
| Hurdal25                       | 11.07 | 60.37 | Regional background | O <sub>3</sub>                                                                            |
| Kårvatn                        | 8.88  | 62.78 | Regional background | O <sub>3</sub>                                                                            |
| Lommedalen                     | 10.49 | 59.95 | Regional background | O <sub>3</sub>                                                                            |
| Prestebakke                    | 11.53 | 59.00 | Regional background | O <sub>3</sub>                                                                            |
| Sandve                         | 5.20  | 59.20 | Regional background | O <sub>3</sub>                                                                            |
| Tustervatn                     | 13.91 | 65.83 | Regional background | O <sub>3</sub>                                                                            |
| Grønland                       | 10.76 | 59.91 | Urban background    | NO <sub>2</sub> , O <sub>3</sub>                                                          |
| Lillehammer                    | 10.47 | 61.12 | Urban background    | NO <sub>2</sub> , PM <sub>10</sub> , PM <sub>2.5</sub>                                    |
| Rådhuset                       | 5.33  | 60.39 | Urban background    | NO <sub>2</sub> , O <sub>3</sub> , PM <sub>10</sub> , PM <sub>2.5</sub>                   |
| Sofienbergparken               | 10.77 | 59.92 | Urban background    | NO <sub>2</sub> , PM <sub>10</sub> , PM <sub>2.5</sub>                                    |
| Torvet                         | 10.40 | 63.43 | Urban background    | NO <sub>2</sub> , PM <sub>10</sub> , PM <sub>2.5</sub>                                    |
| Vaaland                        | 5.73  | 58.96 | Urban background    | NO <sub>2</sub> , PM <sub>10</sub> , PM <sub>2.5</sub>                                    |
| Sweden                         |       |       |                     |                                                                                           |
| Aspvreten                      | 17.38 | 58.80 | Regional background | O <sub>3</sub> , PM <sub>10</sub> , PM <sub>2.5</sub>                                     |
| Bredkalen                      | 15.34 | 63.85 | Regional background | O <sub>3</sub> , PM <sub>2.5</sub>                                                        |
| Esrange                        | 21.07 | 67.88 | Regional background | O <sub>3</sub>                                                                            |
| Raao                           | 11.91 | 57.39 | Regional background | O <sub>3</sub> , PM <sub>10</sub> , PM <sub>2.5</sub>                                     |
| Vavihill                       | 13.15 | 56.03 | Regional background | O <sub>3</sub> , PM <sub>10</sub> , PM <sub>2.5</sub>                                     |
| Grimso                         | 15.47 | 59.73 | Regional background | O <sub>3</sub>                                                                            |
| Norra_Kvill                    | 15.56 | 57.81 | Regional background | O <sub>3</sub>                                                                            |
| Norr_Malma                     | 18.63 | 59.83 | Regional background | NO <sub>2</sub> , O <sub>3</sub> , PM <sub>10</sub>                                       |
| Ostad                          | 12.40 | 57.95 | Regional background | O <sub>3</sub>                                                                            |
| Vavihill                       | 13.15 | 56.03 | Regional background | O <sub>3</sub> , PM <sub>10</sub> , PM <sub>2.5</sub>                                     |
| Vindeln                        | 19.77 | 64.25 | Regional background | O <sub>3</sub>                                                                            |
| Goteborg_Femman                | 11.97 | 57.71 | Urban background    | NO <sub>2</sub> , O <sub>3</sub> , PM <sub>10</sub>                                       |
| Malmo_Raadhuset                | 13.00 | 55.61 | Urban background    | NO <sub>2</sub> , O <sub>3</sub> , PM <sub>10</sub>                                       |
| Stockholm_Torkel_Knutssongatan | 18.06 | 59.32 | Urban background    | NO <sub>2</sub> , O <sub>3</sub> , PM <sub>10</sub>                                       |

Table S2. Model evaluation for the daily mean concentrations of NO<sub>2</sub> and SO<sub>2</sub> for all the available stations in the Nordic countries.

|         | NO <sub>2</sub> |                                      |                                    |                   |                                      | SO <sub>2</sub> |                                      |                                    |                   |                                      |
|---------|-----------------|--------------------------------------|------------------------------------|-------------------|--------------------------------------|-----------------|--------------------------------------|------------------------------------|-------------------|--------------------------------------|
|         | <i>r</i>        | <i>Obs.</i><br>(µg m <sup>-3</sup> ) | <i>MB</i><br>(µg m <sup>-3</sup> ) | <i>NMB</i><br>(%) | <i>RMSE</i><br>(µg m <sup>-3</sup> ) | <i>r</i>        | <i>Obs.</i><br>(µg m <sup>-3</sup> ) | <i>MB</i><br>(µg m <sup>-3</sup> ) | <i>NMB</i><br>(%) | <i>RMSE</i><br>(µg m <sup>-3</sup> ) |
| Denmark | 0.55            | 10.10                                | -4.57                              | -0.33             | 5.59                                 | N/A             | N/A                                  | N/A                                | N/A               | N/A                                  |
| Finland | 0.61            | 5.75                                 | -3.60                              | -0.47             | 3.96                                 | 0.80            | 0.58                                 | -0.19                              | -0.25             | 0.42                                 |
| Norway  | 0.42            | 17.24                                | -15.20                             | -0.82             | 16.29                                | N/A             | N/A                                  | N/A                                | N/A               | N/A                                  |
| Sweden  | 0.63            | 11.45                                | -7.52                              | -0.56             | 7.92                                 | N/A             | N/A                                  | N/A                                | N/A               | N/A                                  |

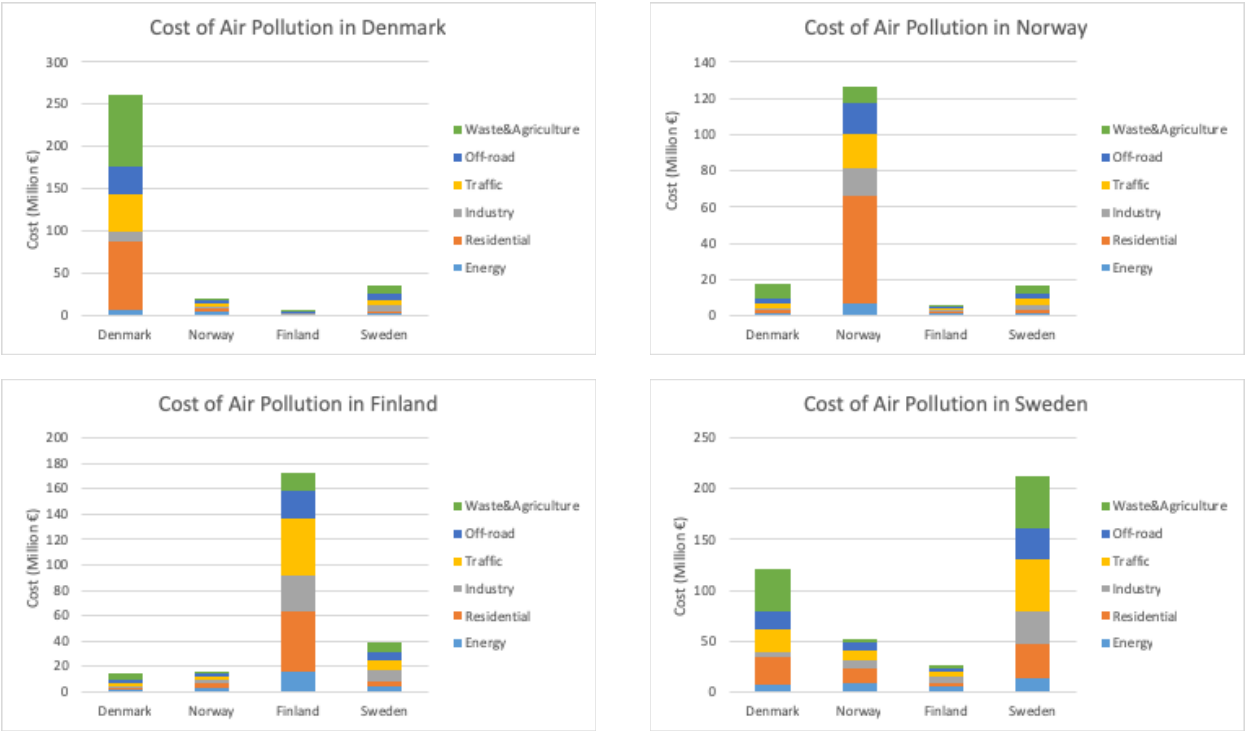

Fig. S1. Sectoral contribution of emissions to health-related costs in a) Denmark, b) Norway, c) Finland, and d) Sweden.
